# Supplementary material for: Characterization and Neuroprotection Potential of Seleno-Polymannuronate
Source: PubMed Central journal article supplement (PMC7044149; doi:10.3389/fphar.2020.00021), 2020-02-20
Supplement: DataSheet_1.pdf [file DataSheet_1.pdf]

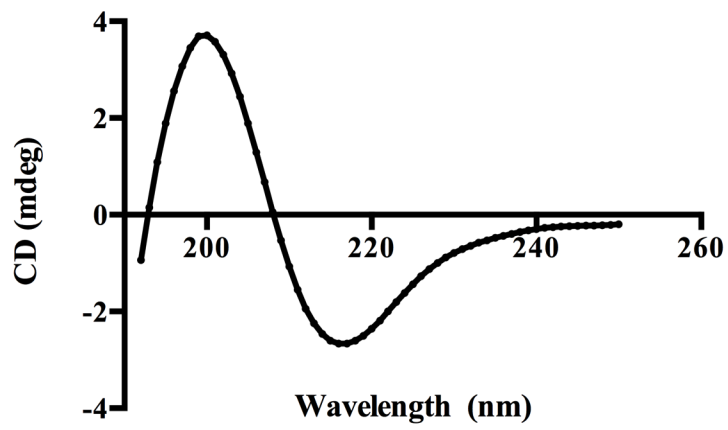

Figure S1. CD spectrum of PM.

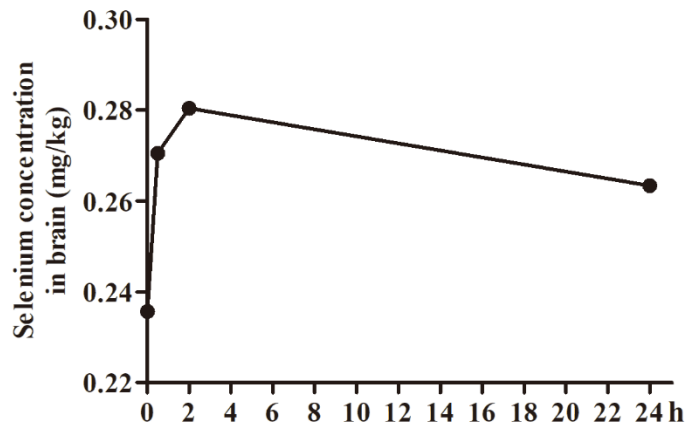

Figure S2. The change of Se content in the mice brain after caudal vein injection with Se-PM.
